# Supplementary material
Source: Springer Nature journal article supplement (https://www.springermedizin.de/resource/supplementary/12916_2013_981_MOESM3_ESM.pdf/9598756)
Supplement: MOESM3 [file 9598756]

**Supplementary Table 3:** Biological pathways including all genes that exhibit differential mRNA expression ( $q < 0.05$ ) in human pancreatic islets due to palmitate treatment.

| Pathway<br>(total number of genes in the pathway) | Observed<br>number of<br>genes | Expected<br>number of<br>genes | Ratio<br>Observed/<br>expected | Raw<br><i>P</i> -value | Adjusted<br><i>P</i> -value |
|---------------------------------------------------|--------------------------------|--------------------------------|--------------------------------|------------------------|-----------------------------|
| Ribosome (81)                                     | 35                             | 7.59                           | 4.61                           | $1.03 \times 10^{-15}$ | $1.85 \times 10^{-13}$      |
| Metabolic pathways (1,026)                        | 150                            | 96.10                          | 1.56                           | $1.70 \times 10^{-08}$ | $1.53 \times 10^{-06}$      |
| Complement and coagulation cascades (67)          | 21                             | 6.28                           | 3.35                           | $4.24 \times 10^{-07}$ | $1.53 \times 10^{-05}$      |
| Glycolysis / Gluconeogenesis (60)                 | 20                             | 5.62                           | 3.56                           | $2.59 \times 10^{-07}$ | $1.53 \times 10^{-05}$      |
| Pathways in cancer (323)                          | 56                             | 30.25                          | 1.85                           | $4.54 \times 10^{-06}$ | 0.0001                      |
| Focal adhesion (196)                              | 39                             | 18.36                          | 2.12                           | $4.75 \times 10^{-06}$ | 0.0001                      |
| Lysosome (115)                                    | 26                             | 10.77                          | 2.41                           | $1.77 \times 10^{-05}$ | 0.0004                      |
| Arginine and proline metabolism (51)              | 15                             | 4.78                           | 3.14                           | $4.35 \times 10^{-05}$ | 0.0007                      |
| ECM-receptor interaction (82)                     | 20                             | 7.68                           | 2.60                           | $5.13 \times 10^{-05}$ | 0.0008                      |
| One carbon pool by folate (15)                    | 7                              | 1.40                           | 4.98                           | 0.0002                 | 0.0024                      |
| Regulation of actin cytoskeleton (204)            | 35                             | 19.11                          | 1.83                           | 0.0003                 | 0.0032                      |
| Cell cycle (121)                                  | 24                             | 11.33                          | 2.12                           | 0.0003                 | 0.0032                      |
| p53 signaling pathway (67)                        | 16                             | 6.28                           | 2.55                           | 0.0004                 | 0.0040                      |
| Methane metabolism (6)                            | 4                              | 0.56                           | 7.12                           | 0.0010                 | 0.0078                      |
| Glutathione metabolism (47)                       | 12                             | 4.40                           | 2.73                           | 0.0010                 | 0.0078                      |
| Retinol metabolism (47)                           | 12                             | 4.40                           | 2.73                           | 0.0010                 | 0.0078                      |
| Pancreatic cancer (71)                            | 15                             | 6.65                           | 2.26                           | 0.0021                 | 0.0151                      |
| Tryptophan metabolism (38)                        | 10                             | 3.56                           | 2.81                           | 0.0021                 | 0.0151                      |
| Fructose and mannose metabolism (33)              | 9                              | 3.09                           | 2.91                           | 0.0026                 | 0.0180                      |
| Insulin signaling pathway (134)                   | 23                             | 12.55                          | 1.83                           | 0.0032                 | 0.0198                      |
| Adherens junction (74)                            | 15                             | 6.93                           | 2.16                           | 0.0032                 | 0.0198                      |
| Biosynthesis of unsaturated fatty acids (22)      | 7                              | 2.06                           | 3.40                           | 0.0030                 | 0.0198                      |
| Fatty acid metabolism (41)                        | 10                             | 3.84                           | 2.60                           | 0.0038                 | 0.0221                      |
| Antigen processing and presentation (55)          | 12                             | 5.15                           | 2.33                           | 0.0043                 | 0.0242                      |
| O-Glycan biosynthesis (30)                        | 8                              | 2.81                           | 2.85                           | 0.0052                 | 0.0253                      |
| ErbB signaling pathway (85)                       | 16                             | 7.96                           | 2.01                           | 0.0051                 | 0.0253                      |
| Gap junction (85)                                 | 16                             | 7.96                           | 2.01                           | 0.0051                 | 0.0253                      |
| Maturity onset diabetes of the young (24)         | 7                              | 2.25                           | 3.11                           | 0.0052                 | 0.0253                      |
| Ascorbate and aldarate metabolism (13)            | 5                              | 1.22                           | 4.11                           | 0.0049                 | 0.0253                      |
| Propanoate metabolism (32)                        | 8                              | 3.00                           | 2.67                           | 0.0079                 | 0.0374                      |

|                                      |                                                                                                                                                                                                                                                                                                                                                                                                                                                                                                                                                                                                                                                                                                                                                                                                                                                                                                                                                                                                                                                                                                                                     |       |      |        |        |
|--------------------------------------|-------------------------------------------------------------------------------------------------------------------------------------------------------------------------------------------------------------------------------------------------------------------------------------------------------------------------------------------------------------------------------------------------------------------------------------------------------------------------------------------------------------------------------------------------------------------------------------------------------------------------------------------------------------------------------------------------------------------------------------------------------------------------------------------------------------------------------------------------------------------------------------------------------------------------------------------------------------------------------------------------------------------------------------------------------------------------------------------------------------------------------------|-------|------|--------|--------|
| Neurotrophin signaling pathway (122) | 20                                                                                                                                                                                                                                                                                                                                                                                                                                                                                                                                                                                                                                                                                                                                                                                                                                                                                                                                                                                                                                                                                                                                  | 11.43 | 1.75 | 0.0094 | 0.0411 |
| Arachidonic acid metabolism (54)     | 11                                                                                                                                                                                                                                                                                                                                                                                                                                                                                                                                                                                                                                                                                                                                                                                                                                                                                                                                                                                                                                                                                                                                  | 5.06  | 2.17 | 0.0104 | 0.0435 |
| <b>Pathway</b>                       | <b>Observed genes</b>                                                                                                                                                                                                                                                                                                                                                                                                                                                                                                                                                                                                                                                                                                                                                                                                                                                                                                                                                                                                                                                                                                               |       |      |        |        |
| Ribosome                             | <i>RPS20, RPS8, RPS2, RPS5, RPL30, RPS17, RPS17, RPL11, RPL18, RPL10, RPL10, RPL17, RPL17, RPS11, RPL27, RPS18, RPS18, RPS18, RPS23, RPL29, RPL35, RPL36AL, RPS25, RPL41, RPS10, RPL38, RPL8, RPS27, RPL18A, RPL10A, RPL27A, RPS9, RPLP0, RPL35A, RPL12, RPL12, RPS15A, RPS7, RPS19, RPL24, FAU</i>                                                                                                                                                                                                                                                                                                                                                                                                                                                                                                                                                                                                                                                                                                                                                                                                                                 |       |      |        |        |
| Metabolic pathways                   | <i>ARG2, ACSL1, UQCRB, MCCC1, ASS1, NANS, CDIPT, GLUL, CHPF, ACSS2, PNLIPRP2, PAPSS1, ALDH1A3, DPYD, DLD, NDUFS2, DNMT1, UGT2B10, PDHA1, LAP3, GALNT5, UPP1, HSD17B2, RRM2, GALNT7, ODC1, IDH1, PLA2G10, CYP4F3, PRIM1, PYCRI, MAN2A2, P4HA2, FBP1, NNT, CYP3A5, BDH2, TYMS, PIK3C2B, ATP6V0E1, PFKP, CYP2J2, DHCR24, ASAH1, , DHRS3, GALNT1, CTPS, PCK1, ST6GALNAC1, AGL, ALDH3A2, PIGS, FDFT1, ADH1A, HSD17B8, HSD17B8, HSD17B8, ALG6, RDH10, AMD1, TBXAS1, FASN, SCP2, HGSNAT, ADH1C, CAT, IDS, COX17, COX17, MTHFD2, HGD, HGD, PAH, CYP4F2, PPAP2B, GCHI, P4HA3, SGMS2, UGT2A3, PLD1, HEXA, ACSS1, PTDSS1, PHPT1, ACSM3, HIBADH, GALNT12, NDUFB5, ATP5I, SDHA, PPAP2A, ATP6V0B, ADII, ASNS, KMO, CMPK1, AMACR, AHCYLI, MMAB, GATM, PLA2G7, POLR2G, MVD, ACO1, ANPEP, PON2, TCIRG1, DDOST, MAOA, GMPPB, HSD3B1, B4GALT3, ST3GAL1, LTA4H, ALDOB, NDUFS1, PGM2, ENO2, DGKZ, SORD, RPE, PMM2, ST6GALNAC4, ADH5, MAT2B, POLR3D, GART, FUT2, HSD11B1, PNLIP, CHST4, SHMT2, ALDH7A1, ADH6, PCCB, CPS1, SHMT1, B3GNT2, ALDH2, GUK1, AKR1B10, GCNT3, POLD3, CYP3A4, CYP2C18, B3GALT5, ACSS3, ACOX1, DHFR, HK1, ACADM, AFMID, PIP5K1B</i> |       |      |        |        |
| Complement and coagulation cascades  | <i>C3, CFH, KLKB1, C6, TFPI, CFI, PLAT, F11, C1QB, SERPINA5, CD59, F10, SERPING1, PLAUI, C1QC, CFB, CFB, CFB, F2R, C4BPA, BDKRB2, THBD, C3AR1</i>                                                                                                                                                                                                                                                                                                                                                                                                                                                                                                                                                                                                                                                                                                                                                                                                                                                                                                                                                                                   |       |      |        |        |
| Glycolysis / Gluconeogenesis         | <i>PDHA1, ADH1A, ADH6, ALDH2, PGM2, ENO2, GALM, ADH1C, ADH5, ACSS2, FBP1, ALDH1A3, PCK1, ALDH7A1, HK1, ALDOB, ACSS1, DLD, ALDH3A2, PFKP</i>                                                                                                                                                                                                                                                                                                                                                                                                                                                                                                                                                                                                                                                                                                                                                                                                                                                                                                                                                                                         |       |      |        |        |
| Pathways in cancer                   | <i>HSP90B1, FNI, FGF13, MTOR, EGF, RASSF1, ERBB2, TGFBRI, STAT5B, CDKN1A, PDGFRA, TGFBRI, FGF19, CCNE1, WNT5A, LAMB3, PIAS1, LAMA3, IGF1R, IGF1R, CDH1, CTNNA1, MITF, COL4A1, NFKB2, PDGFRB, LAMA4, LAMC1, ACVR1B, CDK4, AKT2, PIK3R1, SKP2, KRAS, LAMA2, FOS, TCF7L2, SMAD3, JAK1, FGFR2, NCOA4, HIF1A, CCDC6, IL8, LAMB1, STAT1, HDAC1, KITLG, HGF, ITGAV, DVLI, PLD1, MAPK1, HRAS, ARNT, CDKN2A, HDAC2</i>                                                                                                                                                                                                                                                                                                                                                                                                                                                                                                                                                                                                                                                                                                                       |       |      |        |        |
| Focal adhesion                       | <i>SHC4, FNI, DOCK1, KDR, EGF, ERBB2, PDGFRA, PPP1CC, COL6A3, LAMB3, SPPI, LAMA3, SHC1, CTNNA1, IGF1R, IGF1R, ITGB3, COL4A1, TNN, ITGB6, CAV2, PDGFRB, LAMA4, COL5A2, LAMC1, ITGA4, AKT2, COL1A1, PIK3R1, ITGA5, LAMA2, PAK3, LAMB1,</i>                                                                                                                                                                                                                                                                                                                                                                                                                                                                                                                                                                                                                                                                                                                                                                                                                                                                                            |       |      |        |        |

|                                         |                                                                                                                                                                                                                                                           |
|-----------------------------------------|-----------------------------------------------------------------------------------------------------------------------------------------------------------------------------------------------------------------------------------------------------------|
|                                         | <i>PDGFD, ACTN4, HGF, COL1A2, ITGAV, MAPK1, HRAS</i>                                                                                                                                                                                                      |
| Lysosome                                | <i>LAMP1, CTSE, ASAH1, GGA2, HGSNAT, LIPA, AP3S1, NEU1, NEU1, NEU1, IDS, CD68, ATP6V0B, AP1M2, ENTPD4, CTSS, TCIRG1, CTSC, CTSO, GNPTAB, LAPT M5, LAPT M4B, CTSA, CTSD, HEXA, CTSH, ACP5, LAMP3</i>                                                       |
| Arginine and proline metabolism         | <i>ARG2, ALDH2, CPS1, LAP3, P4HA2, P4HA3, AMD1, MAOA, ASS1, ALDH7A1, ODC1, GATM, GLUL, ALDH3A2, PYCRI</i>                                                                                                                                                 |
| ECM-receptor interaction                | <i>LAMA4, COL5A2, FN1, LAMC1, COL1A1, ITGA4, ITGA5, LAMA2, SDC1, COL6A3, LAMB3, SPP1, LAMA3, LAMB1, ITGB3, COL4A1, ITGAV, COL1A2, TNN, ITGB6</i>                                                                                                          |
| One carbon pool by folate               | <i>DHFR, TYMS, SHMT2, GART, SHMT1, MTHFD2, MTFMT</i>                                                                                                                                                                                                      |
| Regulation of actin cytoskeleton        | <i>FN1, FGF13, DOCK1, EGF, ENAH, NCKAP1, DIAPH3, PDGFRA, FGF19, PPP1CC, IQGAP2, ITGB3, F2R, ITGB6, PDGFRB, CFL1, LIMK2, CYFIP1, ITGA4, PIK3R1, EZR, ITGA5, KRAS, ARHGEF12, ITGB2, PAK3, CSK, FGFR2, PDGFD, ACTN4, ITGAV, MAPK1, HRAS, BDKRB2, PIP5K1B</i> |
| Cell cycle                              | <i>CDKN1C, PRKDC, CDK4, SKP2, CHEK1, CDKN1A, CCNB1, MCM7, CDC26, CCNE1, CDC2, SMAD3, WEE1, CCNA2, PCNA, TTK, HDAC1, ATR, TFDP2, CCNB2, YWHAB, CDKN2A, HDAC2, SFN</i>                                                                                      |
| p53 signaling pathway                   | <i>SESN2, SESN3, PMAIP1, CDK4, TNFRSF10B, RRM2, CHEK1, ATR, CDKN1A, CCNB1, CCNB2, TP53I3, CCNE1, CDC2, CDKN2A, SFN</i>                                                                                                                                    |
| Methane metabolism                      | <i>CAT, ADH5, SHMT2, SHMT1</i>                                                                                                                                                                                                                            |
| Glutathione metabolism                  | <i>GSTK1, GPX3, GSTM2, LAP3, GPX2, RRM2, IDH1, ODC1, MGST1, ANPEP, GSTA1, GPX4</i>                                                                                                                                                                        |
| Retinol metabolism                      | <i>ADH5, ADH1A, ADH6, CYP1A1, RDH10, CYP3A5, UGT2A3, DHRS3, CYP3A4, CYP2C18, UGT2B10, ADH1C</i>                                                                                                                                                           |
| Pancreatic cancer                       | <i>SMAD3, JAK1, ACVR1B, AKT2, CDK4, EGF, PIK3R1, STAT1, ERBB2, TGFBRI, KRAS, PLD1, MAPK1, TGFBR2, CDKN2A</i>                                                                                                                                              |
| Tryptophan metabolism                   | <i>CAT, ALDH2, CYP1A1, KMO, MAOA, ALDH7A1, AFMID, ALDH3A2, WARS, CYP1B1</i>                                                                                                                                                                               |
| Fructose and mannose metabolism         | <i>SORD, FBP1, AKR1B10, GMPPB, HK1, PMM2, ALDOB, PHPT1, PFKP</i>                                                                                                                                                                                          |
| Insulin signaling pathway               | <i>SHC4, MTOR, AKT2, PRKAA1, PIK3R1, FASN, KRAS, PRKAR2B, PPP1CC, IRS4, PRKAG3, IRS2, INSR, SOCS1, SHC1, FBP1, PCK1, MKNK2, HK1, PPARGC1A, MAPK1, HRAS, PRKARIA</i>                                                                                       |
| Adherens junction                       | <i>SMAD3, INSR, IGF1R, IGF1R, CTNNB1, CDH1, ACVR1B, ACTN4, ERBB2, TGFBRI, CTNND1, MAPK1, TGFBR2, TCF7L2, SNAI2, FARP2</i>                                                                                                                                 |
| Biosynthesis of unsaturated fatty acids | <i>FADS1, SCD, SCD, FADS2, PECCR, PTPLB, SCD5, ACOX1</i>                                                                                                                                                                                                  |
| Fatty acid metabolism                   | <i>ADH5, ADH1A, ADH6, ACSLI, ALDH2, ACOX1, ALDH7A1, ACADM, ALDH3A2, ADH1C</i>                                                                                                                                                                             |

|                                      |                                                                                                                                                   |
|--------------------------------------|---------------------------------------------------------------------------------------------------------------------------------------------------|
| Antigen processing and presentation  | <i>HLA-DRA, HLA-DRA, HLA-DMA, HLA-DMA, HLA-DMA, CTSS, HSPA5, HLA-DMB, HLA-DMB, IFI30, B2M, RFX5, CREB1, HLA-DPB1, CD74, HSPA6</i>                 |
| O-Glycan biosynthesis                | <i>GALNT1, B4GALT5, GALNT5, GALNT12, GCNT3, ST6GALNAC1, GALNT7, ST3GAL1</i>                                                                       |
| ErbB signaling pathway               | <i>SHC4, MTOR, AKT2, EGF, PIK3R1, ERBB2, STAT5B, KRAS, CDKN1A, PAK3, SHC1, NCK2, ERBB3, MAPK1, GAB1, HRAS</i>                                     |
| Gap junction                         | <i>EGF, TUBA1C, KRAS, TUBB6, ITPR2, PDGFRA, CDC2, ADCY2, TUBA8, TUBB2B, PDGFD, GNAQ, MAPK1, HRAS, PDGFRB, TUBA4A</i>                              |
| Maturity onset diabetes of the young | <i>HHEX, FOXA2, NKX2-2, HNF4G, NR5A2, HNF1B, NEUROD1</i>                                                                                          |
| Ascorbate and aldarate metabolism    | <i>ALDH7A1, UGT2A3, ALDH2, ALDH3A2, UGT2B10</i>                                                                                                   |
| Propanoate metabolism                | <i>PCCB, ALDH2, ACSS3, ACSS2, ALDH7A1, ACADM, ACSS1, ALDH3A2</i>                                                                                  |
| Neurotrophin signalling pathway      | <i>SHC4, RPS6KA1, AKT2, PIK3R1, KRAS, PSEN1, IRS4, IRS2, IRAK1, KIDINS220, SHC1, CSK, PRKCD, ARHGDI, NFKBIB, MAPK1, HRAS, GAB1, YWHAB, MAP3K1</i> |
| Arachidonic acid metabolism          | <i>GPX3, CYP4F2, CYP2J2, GPX2, TBXAS1, AKR1C3, LTA4H, CYP4F3, PLA2G10, CYP2C18, GPX4</i>                                                          |
